# Supplementary material for: An analytic and systematic framework for estimating metabolic flux ratios from 13C tracer experiments
Source: Springer Nature journal article supplement (doi:10.1186/1471-2105-9-266), 2008-06-06

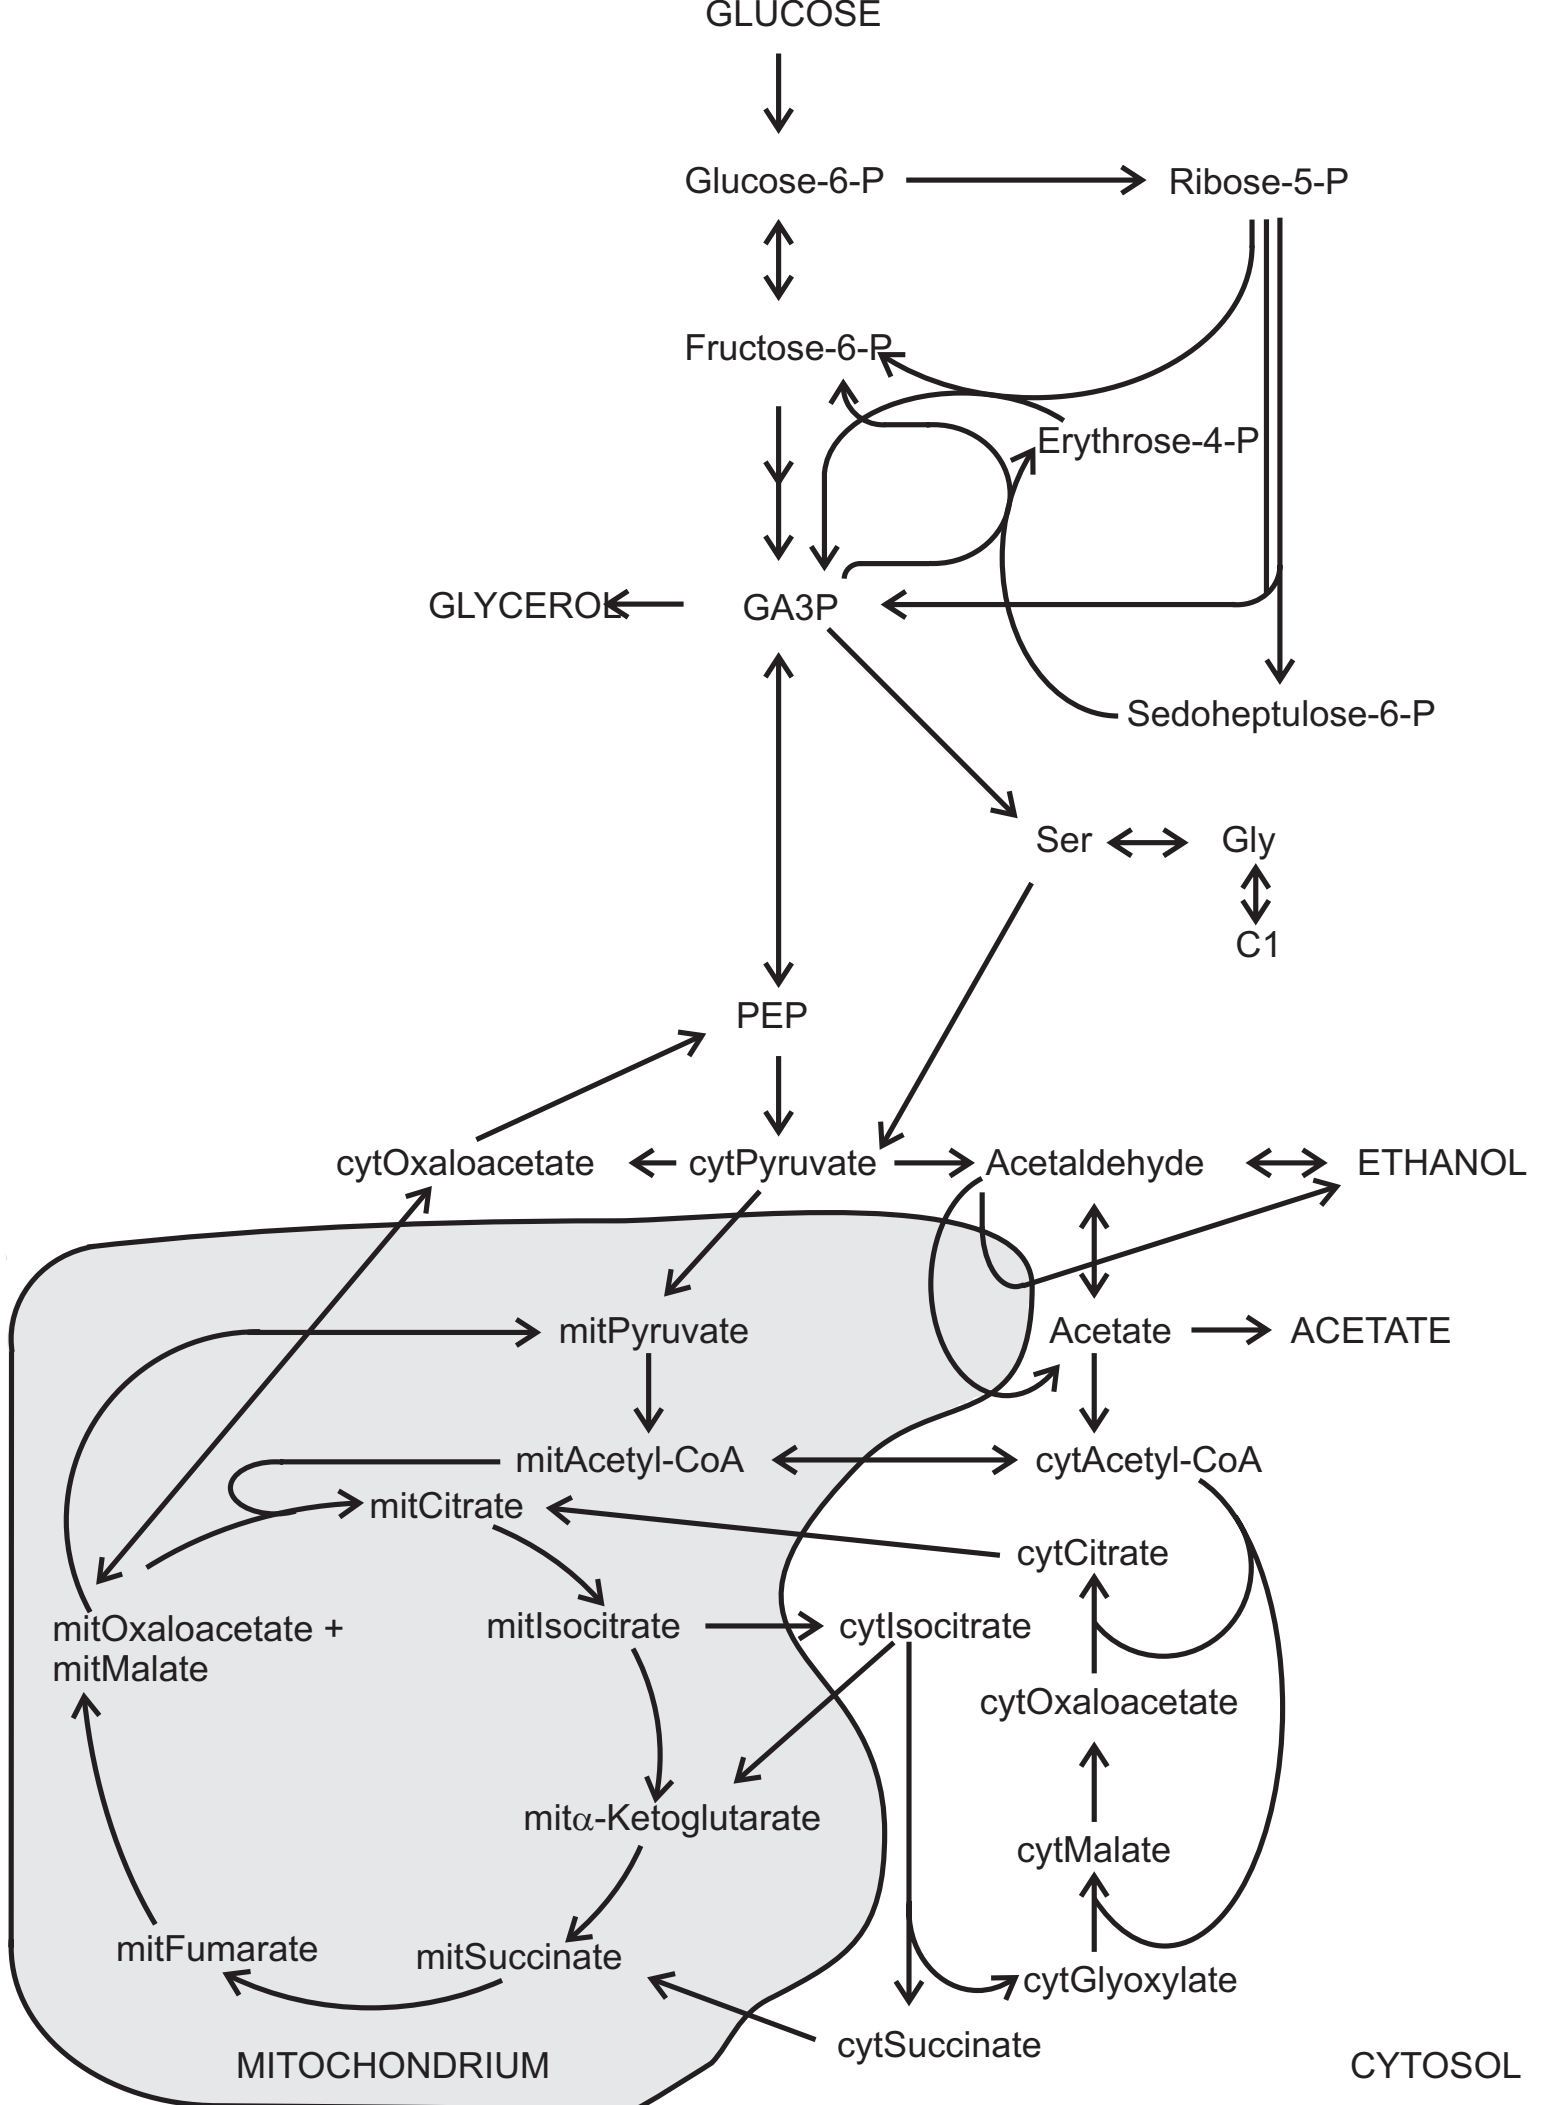

Supplement: Additional file 2 [file 1471-2105-9-266-s2.pdf]
